# Supplementary material for: Synthesis of nitrile-containing ortho-amide benzoxazines for achieving thermosets with low curing temperature and superior performance
Source: Royal Society of Chemistry journal article supplement (doi:10.1039/d4py00777h), 2024-01-01
Supplement: d4py00777h1.pdf [file d4py00777h1.pdf]

## Supporting Information

### Synthesis of Nitrile-Containing *Ortho*-Amide Benzoxazines for Achieving Thermosets with Low Curing Temperature and Superior Performance

Yin Lu, Jiaqi Wang, Yi Yang, Yichen Jing, and Kan Zhang \*

Institute of Polymer Materials, School of Materials Science and Engineering, Jiangsu University, Zhenjiang 212013, China.

\*: To whom correspondence should be addressed:

Kan Zhang: zhangkan@ujs.edu.cn

#### Tables of Contents

|                                                                                  |            |
|----------------------------------------------------------------------------------|------------|
| <b>S1 Synthesis of nitrile modified <i>ortho</i>-amide benzoxazine monomers.</b> | <b>S2</b>  |
| <b>S2 FT-IR spectra.</b>                                                         | <b>S2</b>  |
| <b>S3 2D <sup>1</sup>H–<sup>13</sup>C HMQC.</b>                                  | <b>S3</b>  |
| <b>S4 DSC thermograms.</b>                                                       | <b>S3</b>  |
| <b>S5 Calculation of activation energy for the monomers.</b>                     | <b>S4</b>  |
| <b>S6 Conversion versus temperature profile for the monomers.</b>                | <b>S4</b>  |
| <b>S7 In situ FT-IR spectra.</b>                                                 | <b>S5</b>  |
| <b>S8 The data corresponding to the thermal stability and flame retardancy.</b>  | <b>S5</b>  |
| <b>S9 The data corresponding to the mechanical property.</b>                     | <b>S5</b>  |
| <b>S10 <sup>1</sup>H NMR Spectrum</b>                                            | <b>S6</b>  |
| <b>S11 <sup>13</sup>C NMR Spectrum</b>                                           | <b>S9</b>  |
| <b>S12. HR-MS Spectrum.</b>                                                      | <b>S12</b> |
| <b>S13. Detailed DFT optimized structure</b>                                     | <b>S14</b> |

## S1 Synthesis of nitrile modified *ortho*-amide benzoxazine monomers.

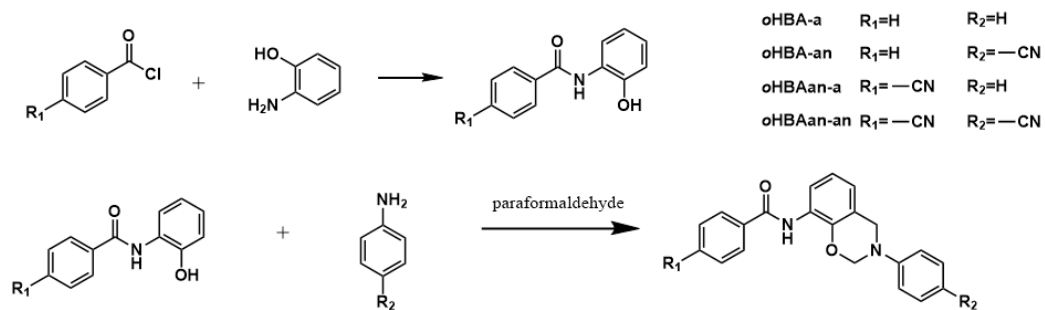

Fig. S1 Synthesis of nitrile modified *ortho*-amide benzoxazine monomers.

## S2 FT-IR spectra.

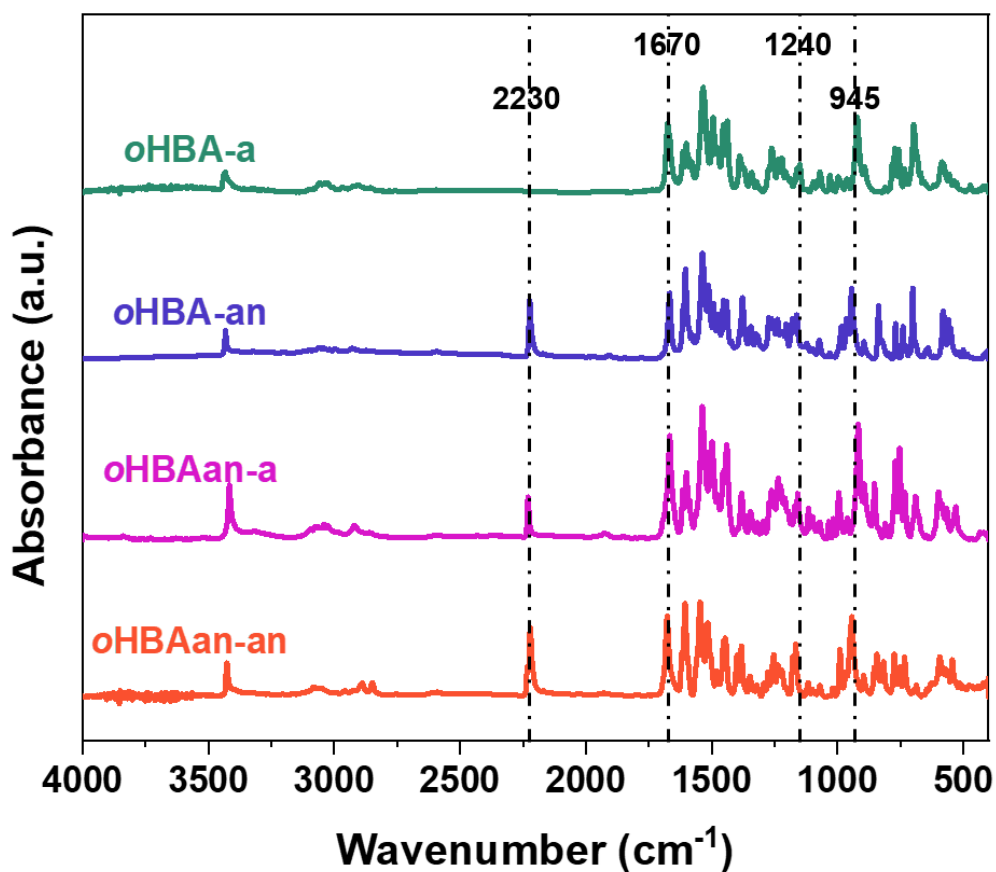

Fig. S2 FT-IR spectra of the *ortho*-amide benzoxazine monomers.

### S3 2D $^1\text{H}$ - $^{13}\text{C}$ HMQC.

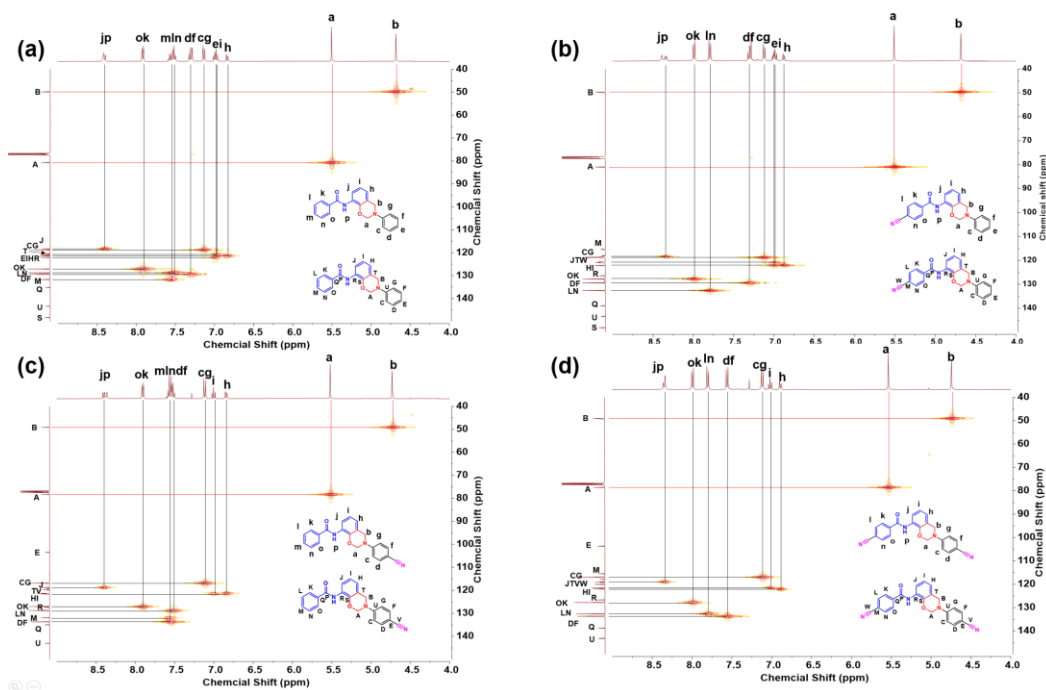

Fig. S3 2D  $^1\text{H}$ - $^{13}\text{C}$  HMQC of the *o*HBA-a (a), *o*HBA-an(b), *o*HBAAn-a (c), and *o*HBAAn-an (d) in  $\text{CDCl}_3$ .

### S4 DSC thermograms.

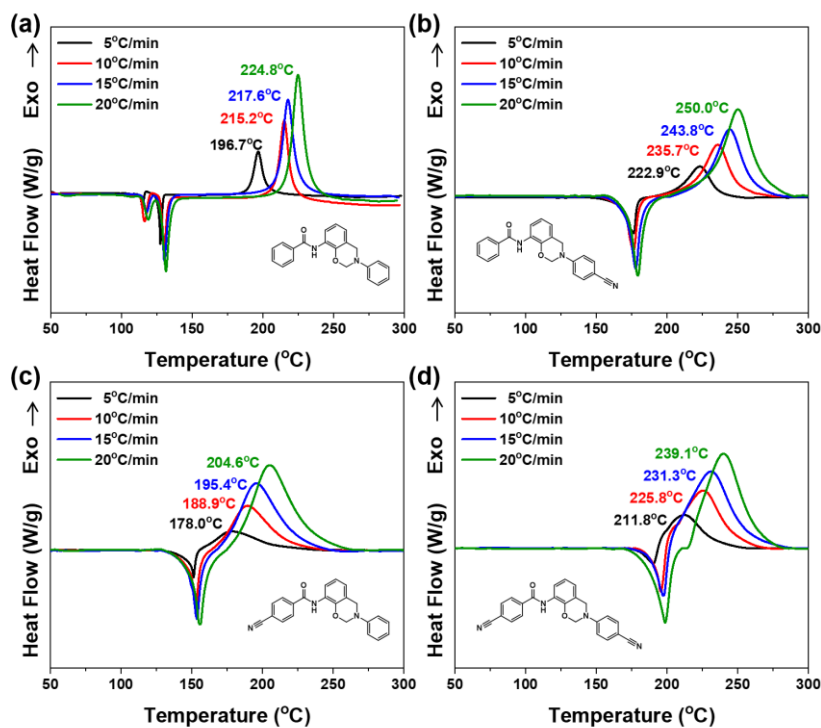

Fig. S4 DSC thermograms of *o*HBA-a (a), *o*HBA-an(b), *o*HBAAn-a (c), and *o*HBAAn-an (d) at different heating rates.

### S5 Calculation of activation energy for the monomers.

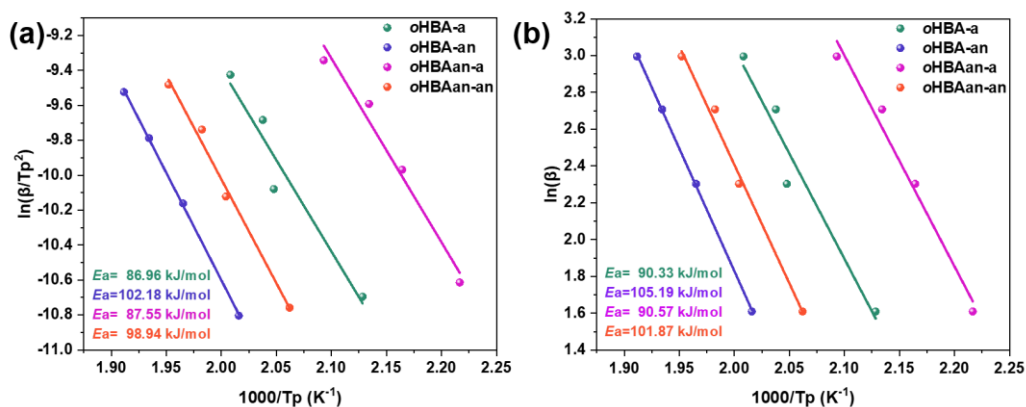

Fig. S5 Representations of the calculation of activation energy for the monomers using Kissinger method (a) and Ozawa method (b).

### S6 Conversion versus temperature profile for the monomers.

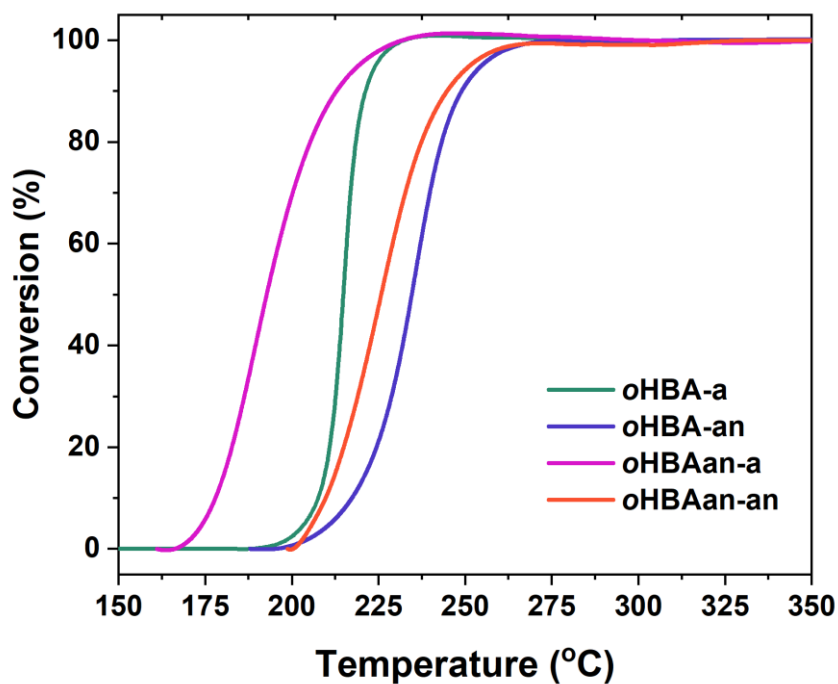

Fig. S6 The plots of conversion vs temperature at heating rate of 10 °C/min obtained by DSC.

## S7 In situ FT-IR spectra.

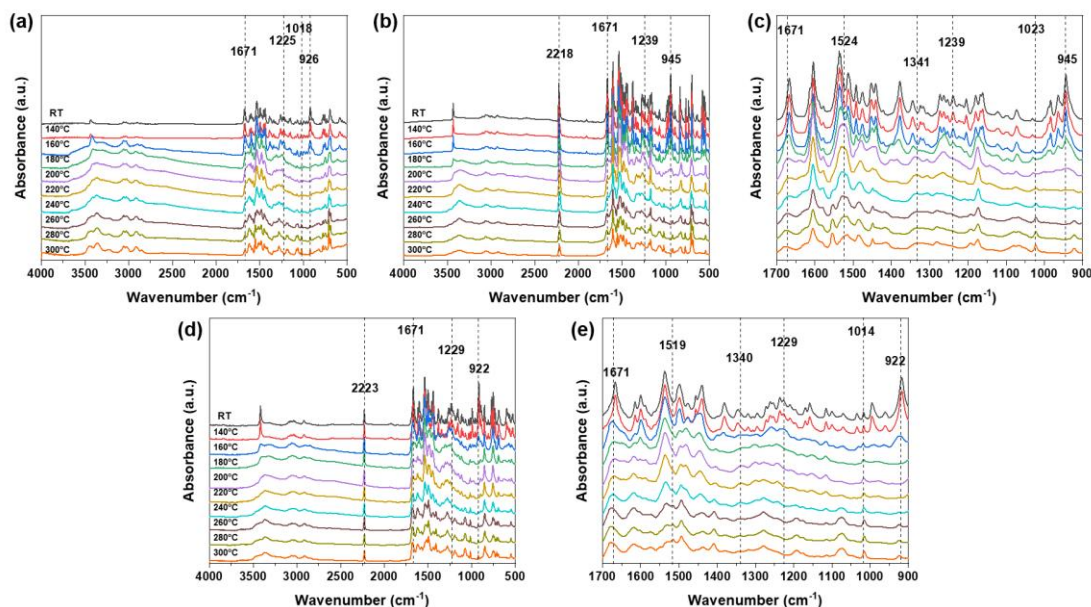

Fig. S7 In situ FT-IR spectra of *o*HBA-a (a), *o*HBA-an(b), partially enlarged *o*HBA-an (c), *o*HBAAn-a (d), partially enlarged *o*HBAAn-a(e).

## S8 The data corresponding to the thermal stability and flame retardancy.

Table S1 The thermal stability and flame retardancy of the thermosets.

| Samples                  | T <sub>d5</sub> (°C) | T <sub>d10</sub> (°C) | Y <sub>c</sub> (%) | HRC<br>(J·g <sup>-1</sup> ·K <sup>-1</sup> ) | THR<br>(kJ·g <sup>-1</sup> ) | T <sub>g</sub> (°C)<br>(DMA) |
|--------------------------|----------------------|-----------------------|--------------------|----------------------------------------------|------------------------------|------------------------------|
| poly( <i>o</i> HBA-a)    | 354.0                | 396.7                 | 42.3               | 210.2                                        | 24.6                         | 280                          |
| poly( <i>o</i> HBA-an)   | 362.0                | 396.4                 | 54.9               | 40.2                                         | 10.0                         | 304                          |
| poly( <i>o</i> HBAAn-a)  | 392.5                | 456.3                 | 63.8               | 56.0                                         | 7.5                          | 326                          |
| poly( <i>o</i> HBAAn-an) | 392.5                | 429.0                 | 68.0               | 23.9                                         | 3.9                          | 331                          |

## S9 The data corresponding to the mechanical property.

Table S2 The mechanical property of the thermosets.

| Samples                  | Tensile property |                   |                            | Flexural property |                   |
|--------------------------|------------------|-------------------|----------------------------|-------------------|-------------------|
|                          | Modulus<br>(GPa) | Strength<br>(MPa) | Elongation at break<br>(%) | Modulus<br>(GPa)  | Strength<br>(MPa) |
| poly( <i>o</i> HBA-a)    | 4.6±0.3          | 62.0±7.2          | 1.21±0.18                  | 6.0±0.4           | 63.2±4.6          |
| poly( <i>o</i> HBA-an)   | 5.0±0.4          | 70.1±7.6          | 1.02±0.19                  | 6.3±0.5           | 52.2±5.8          |
| poly( <i>o</i> HBAAn-a)  | 4.9±0.6          | 71.2±9.3          | 1.03±0.21                  | 6.1±0.7           | 53.4±6.7          |
| poly( <i>o</i> HBAAn-an) | 5.2±0.3          | 75.4±5.0          | 0.95±0.12                  | 7.1±0.4           | 50.6±4.1          |

### S10 $^1\text{H}$ NMR Spectrum

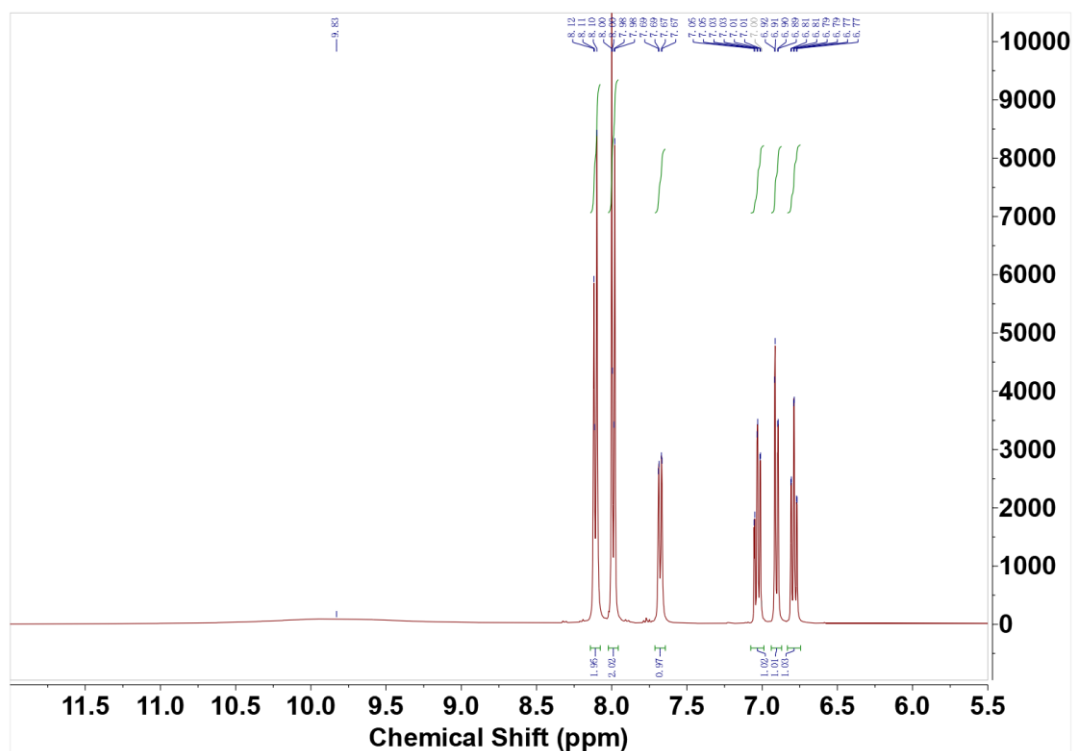

$^1\text{H}$  NMR Spectrum of *o*-HBAAn

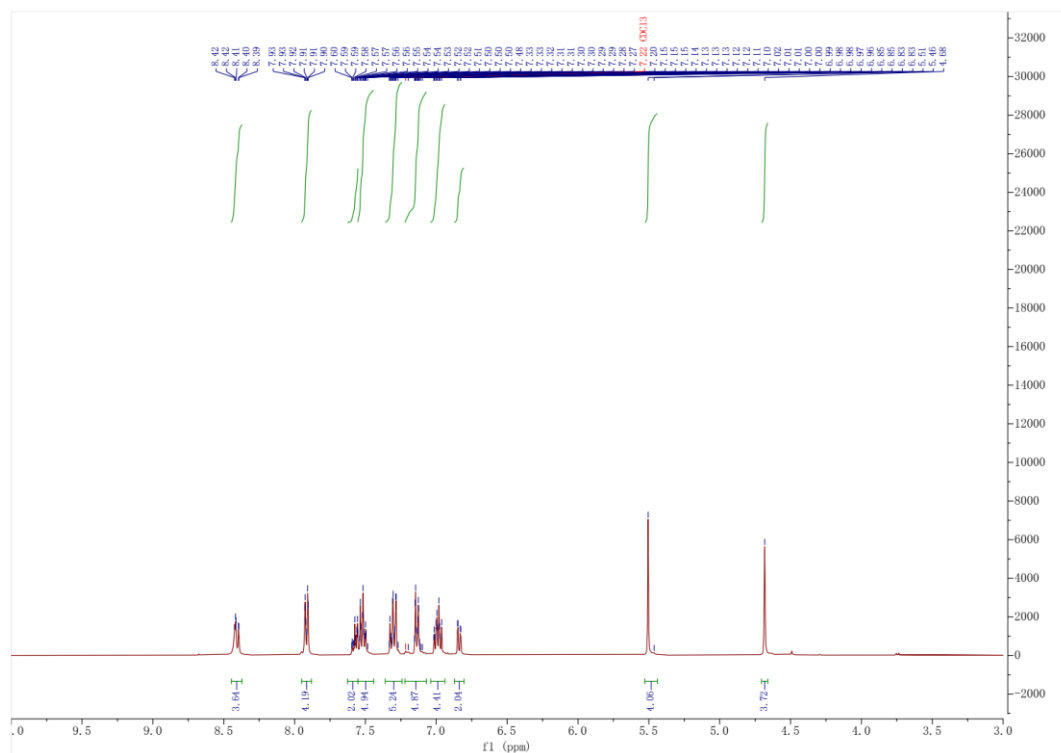

$^1\text{H}$  NMR Spectrum of *o*HBA-a

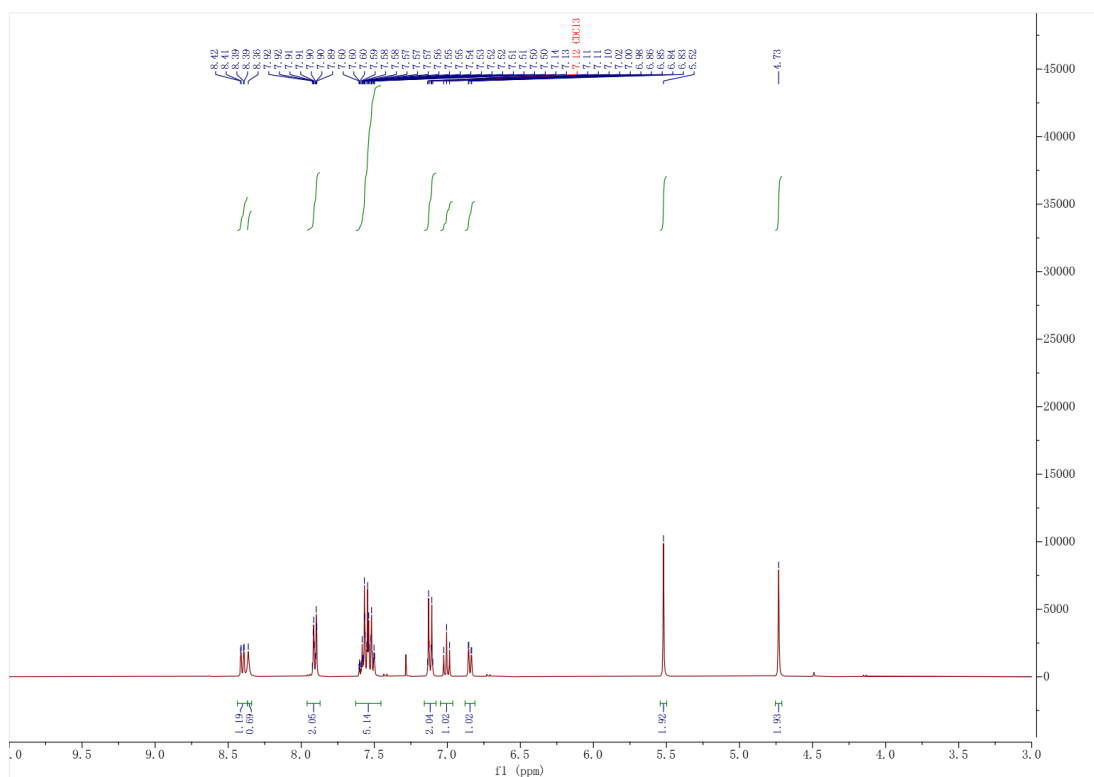

<sup>1</sup>H NMR Spectrum of oHBA-an

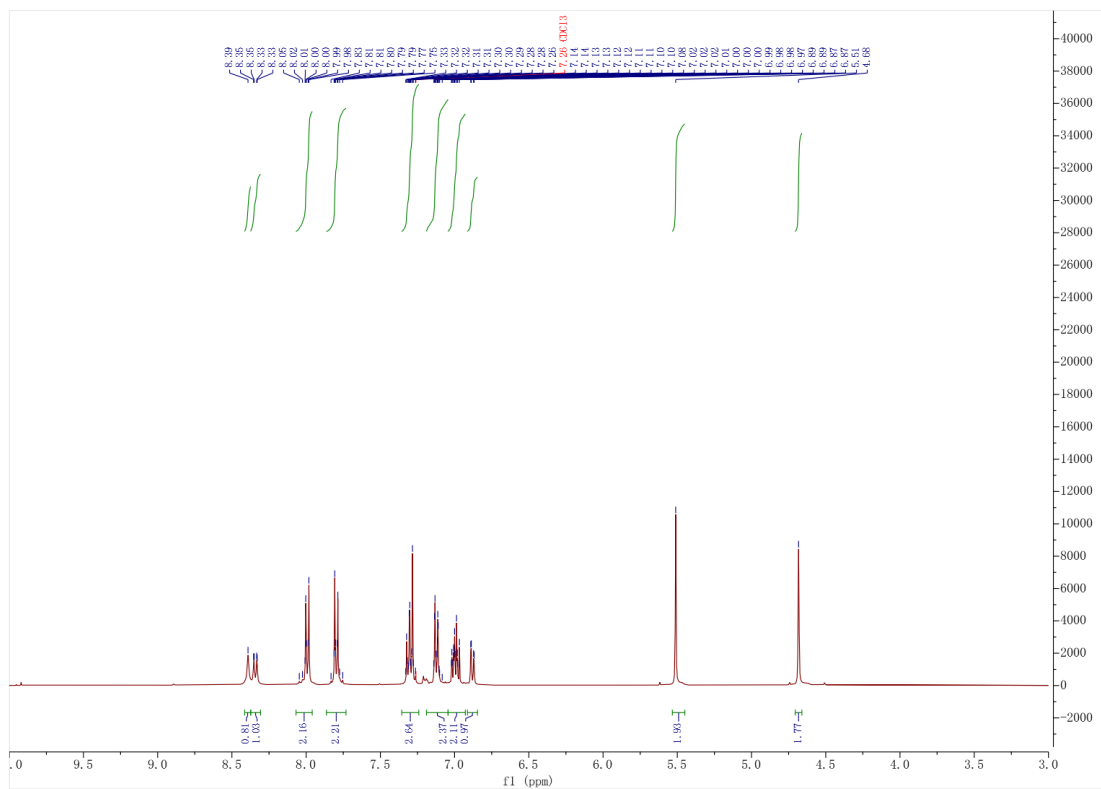

<sup>1</sup>H NMR Spectrum of oHBAAn-a

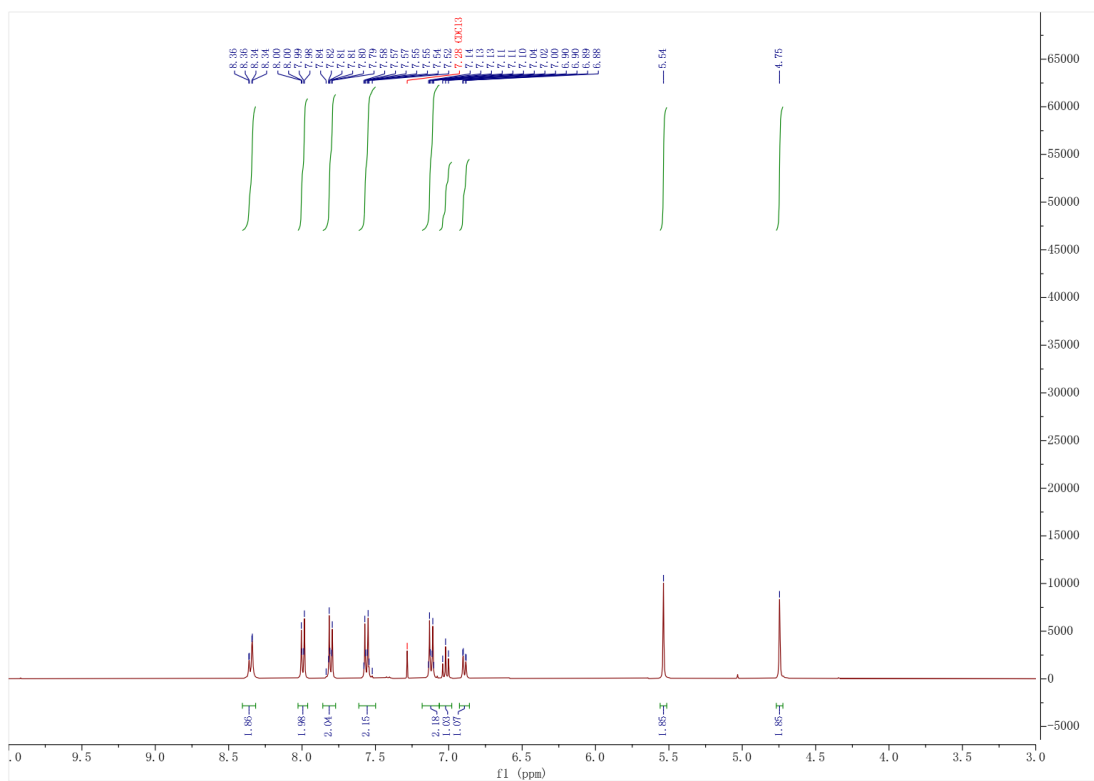

<sup>1</sup>H NMR Spectrum of oHBAAn-an



### S11 <sup>13</sup>C NMR Spectrum

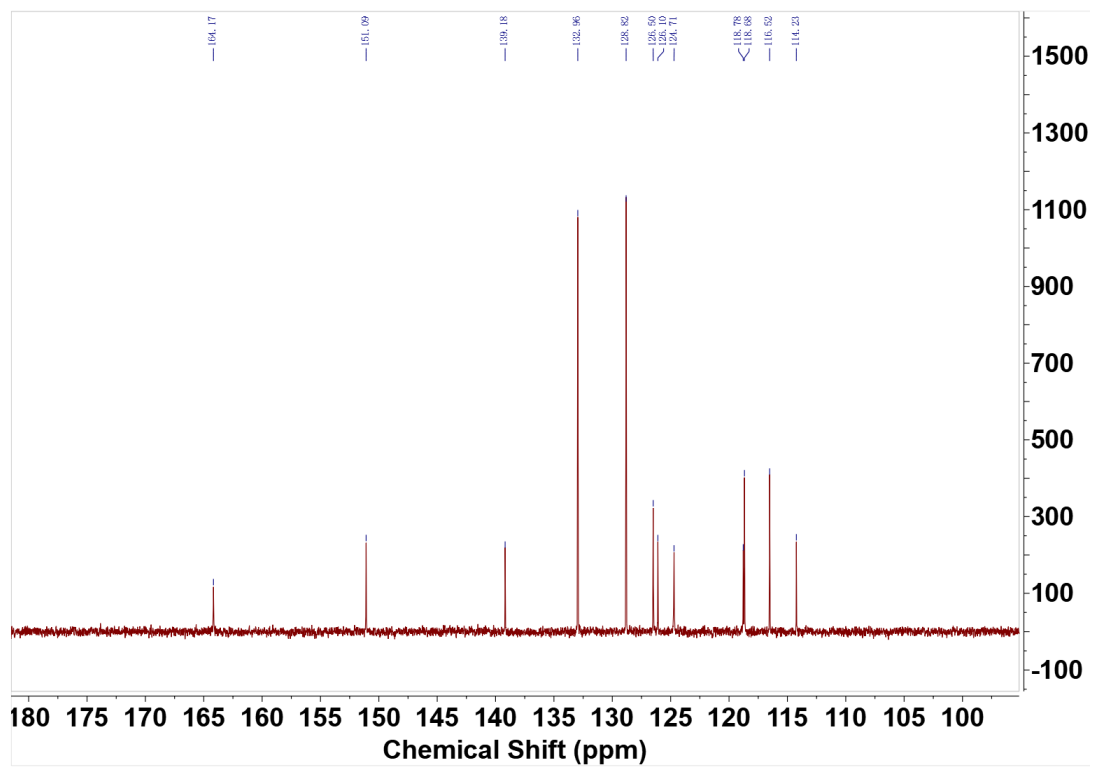

<sup>13</sup>C NMR Spectrum of *o*-HBAan

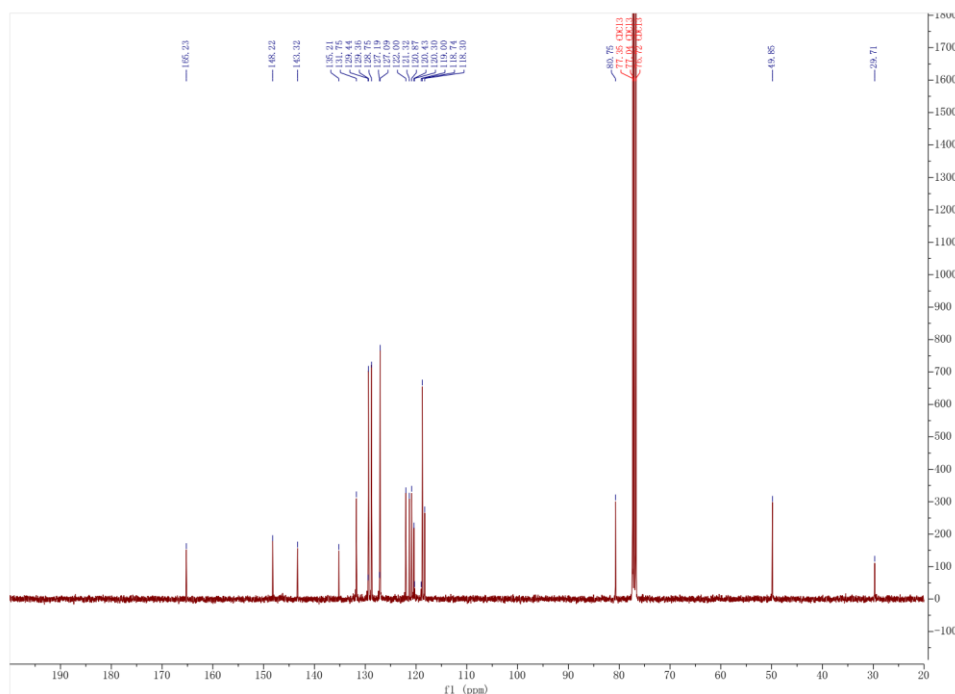

<sup>13</sup>C NMR Spectrum of *o*HBA-a

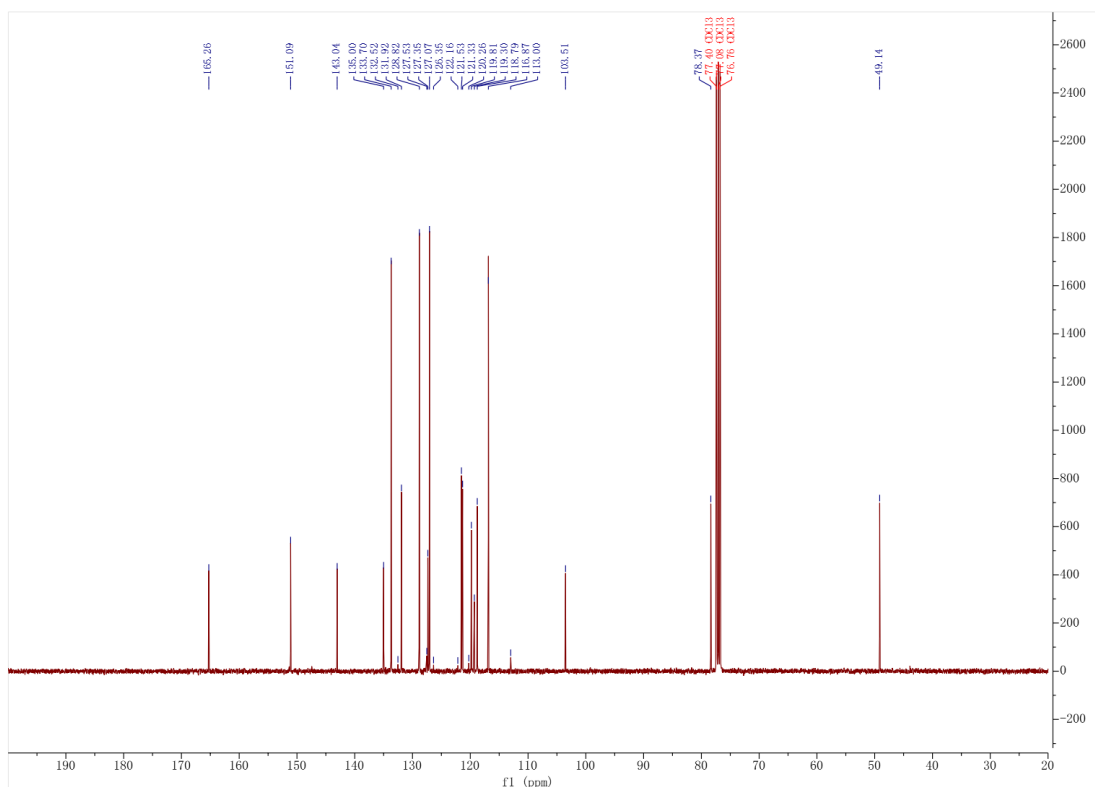

<sup>13</sup>C NMR Spectrum of *o*HBA-an

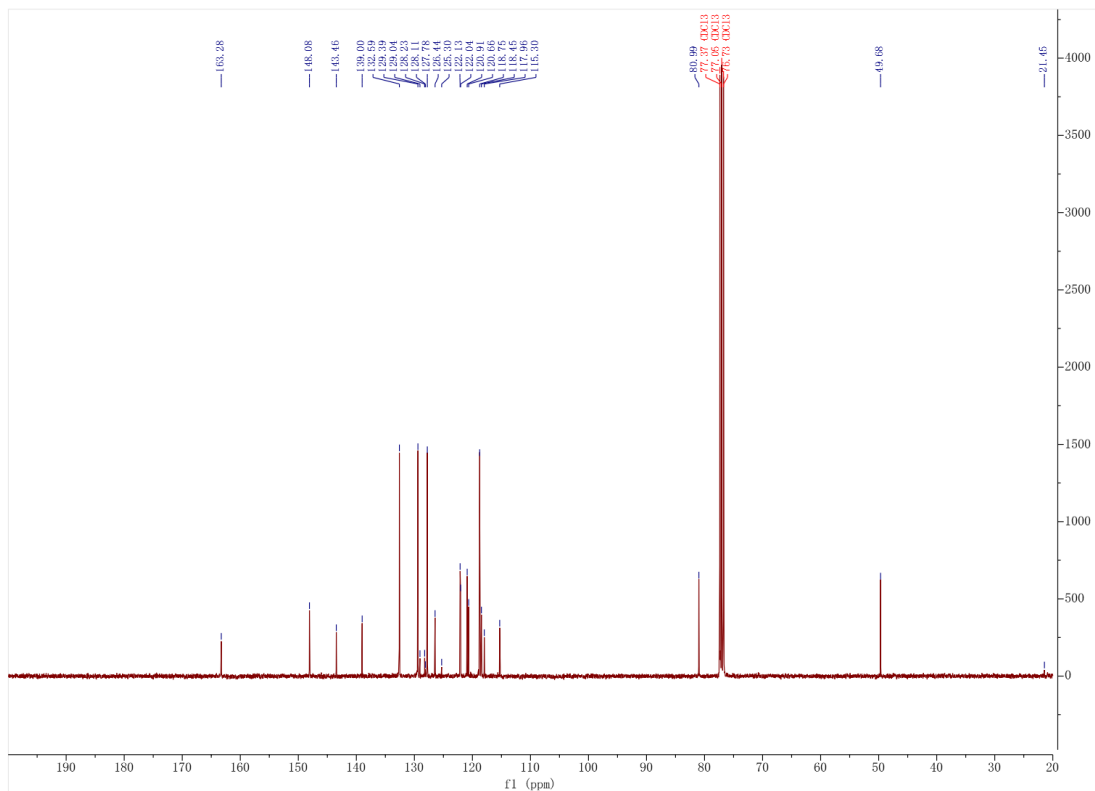

<sup>13</sup>C NMR Spectrum of *o*HBAan-a

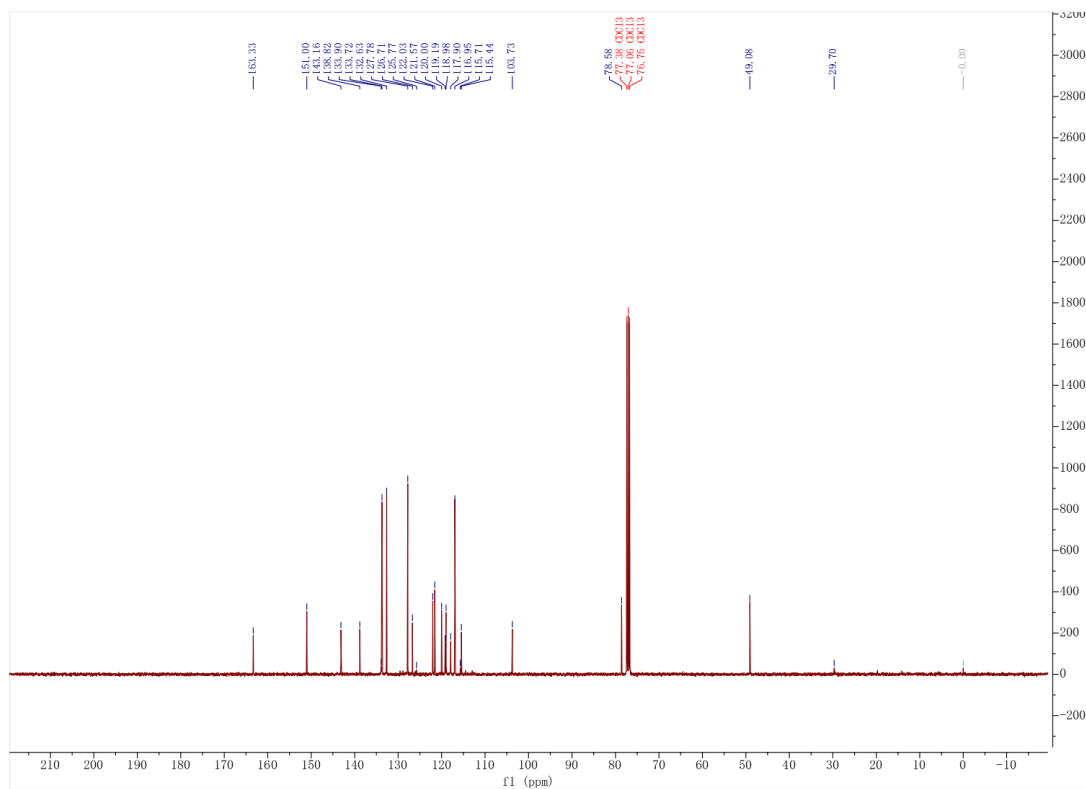

$^{13}\text{C}$  NMR Spectrum of *o*HBAAn-an

## S12. HR-MS Spectrum.

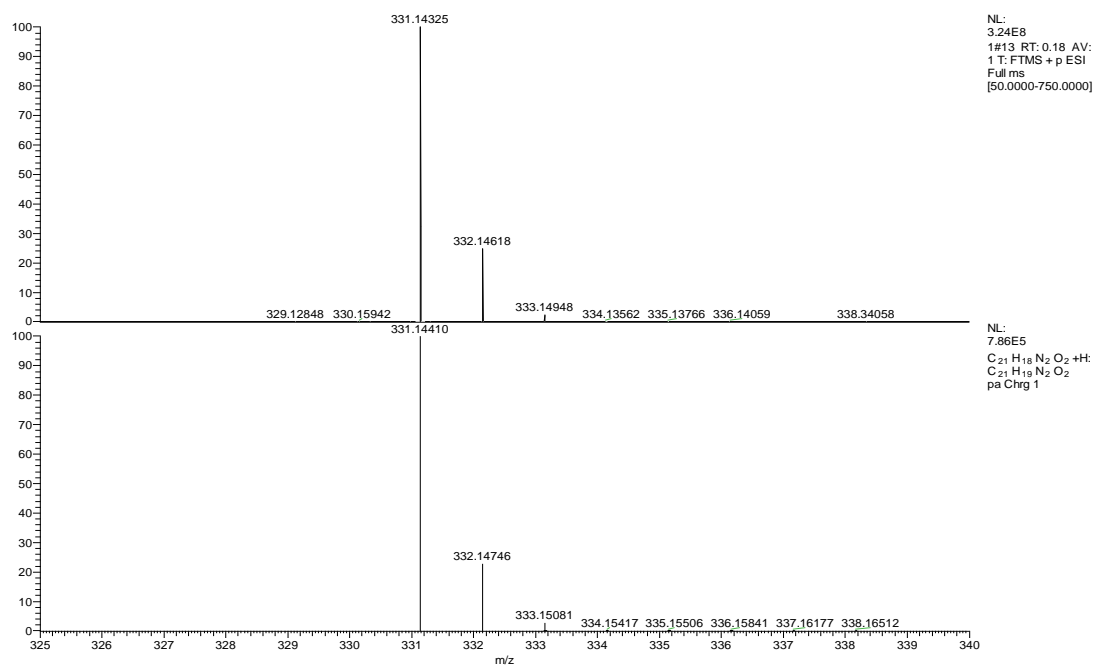

HR-MS Spectrum of *o*HBA-a

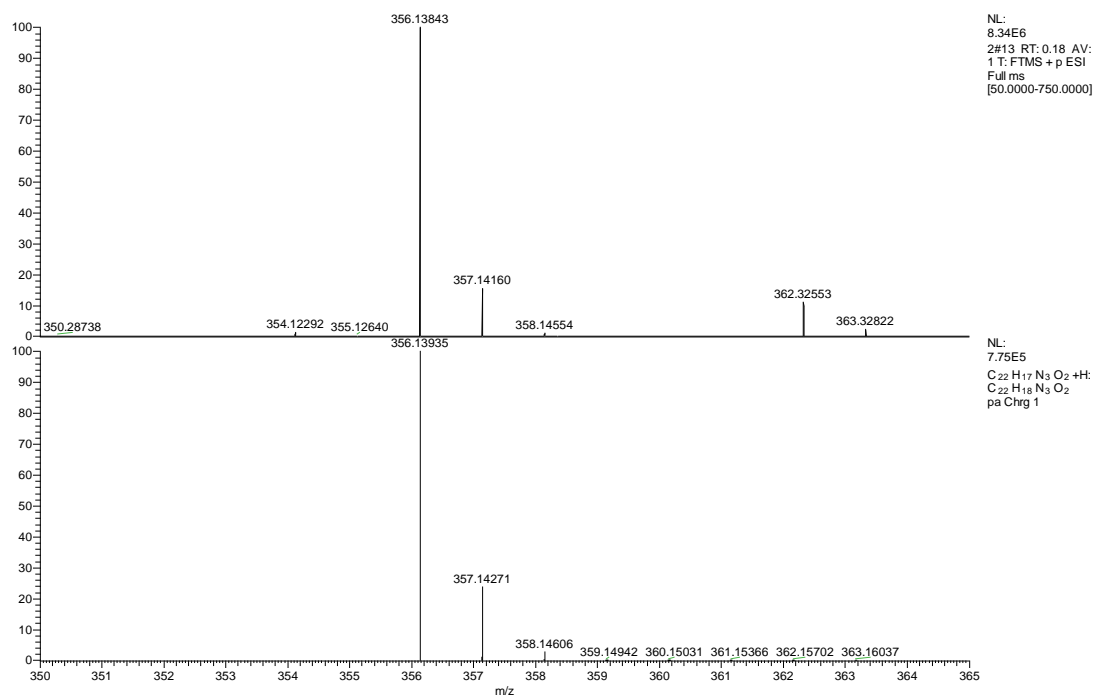

HR-MS Spectrum of *o*HBA-an

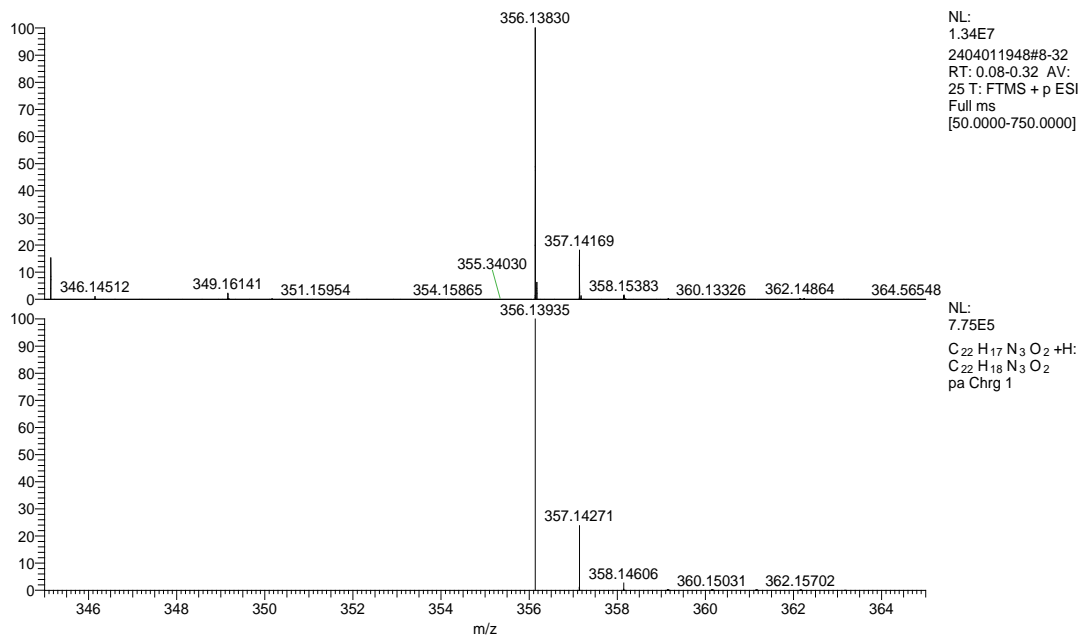

HR-MS Spectrum of *o*HBAan-a

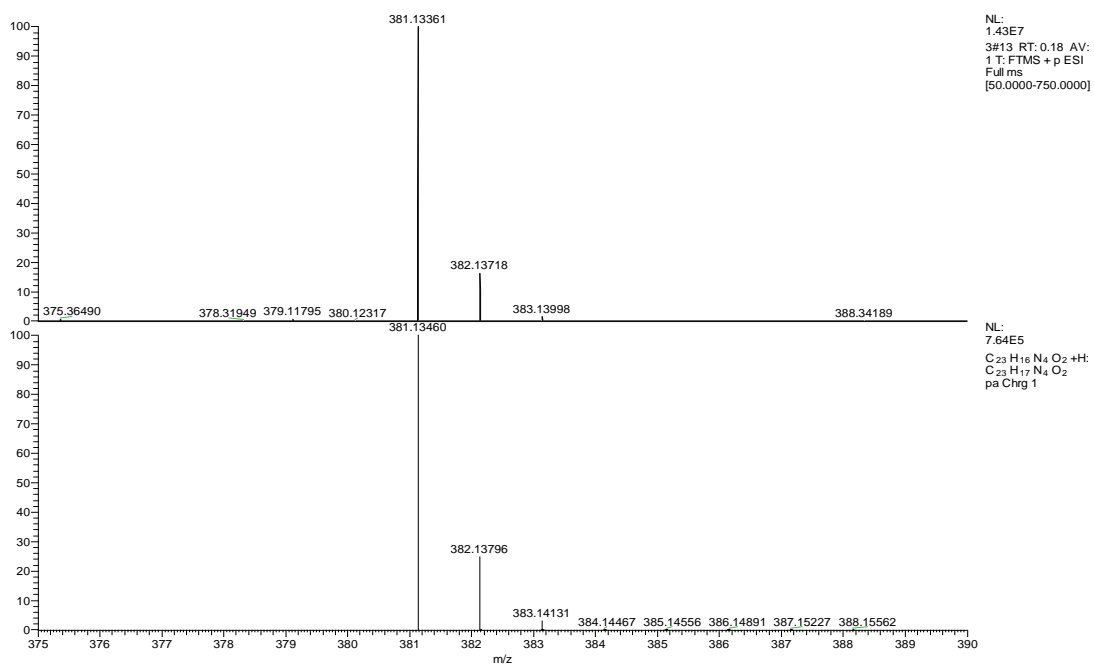

HR-MS Spectrum of *o*HBAan-an

### S13. Detailed DFT optimized structure

#### 1.oHBA-a

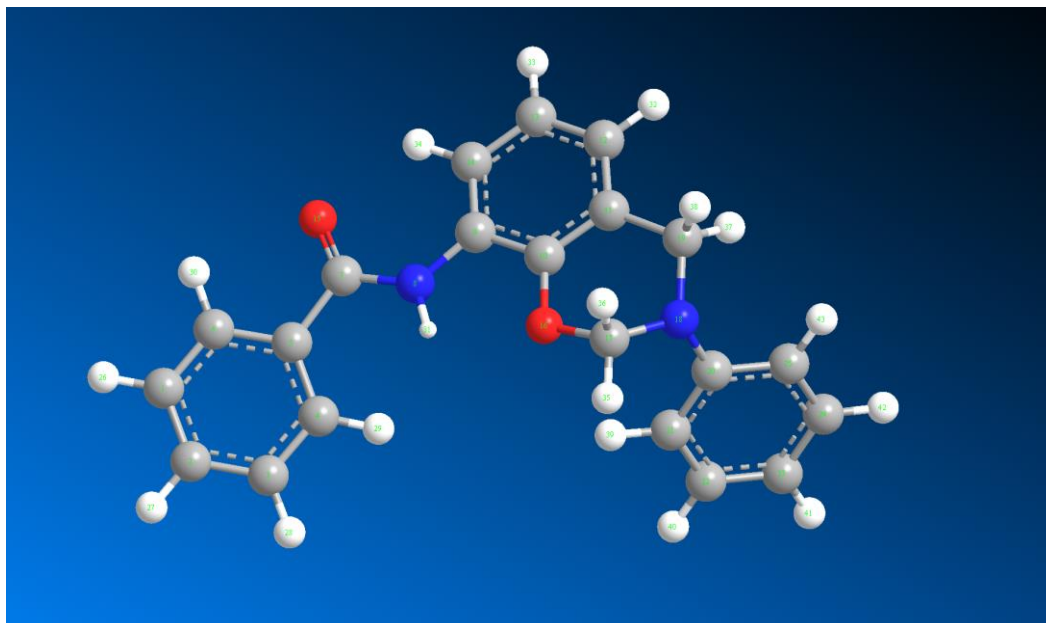

| Tag | Symbol | X       | Y       | Z       |
|-----|--------|---------|---------|---------|
| 1   | C      | -6.3378 | -1.9311 | 0.0761  |
| 2   | C      | -5.6708 | -3.0976 | 0.4593  |
| 3   | C      | -4.2755 | -3.1223 | 0.4882  |
| 4   | C      | -3.5484 | -1.9811 | 0.1494  |
| 5   | C      | -4.212  | -0.8028 | -0.2236 |
| 6   | C      | -5.6128 | -0.7938 | -0.2703 |
| 7   | C      | -3.5069 | 0.4673  | -0.6135 |
| 8   | N      | -2.2272 | 0.5964  | -0.1199 |
| 9   | C      | -1.3178 | 1.6476  | -0.3183 |
| 10  | C      | -0.0814 | 1.5309  | 0.3539  |
| 11  | C      | 0.9116  | 2.505   | 0.231   |
| 12  | C      | 0.6562  | 3.625   | -0.5701 |
| 13  | C      | -0.5599 | 3.7523  | -1.2332 |
| 14  | C      | -1.5488 | 2.7719  | -1.1177 |
| 15  | O      | -4.0559 | 1.3174  | -1.307  |
| 16  | O      | 0.0863  | 0.395   | 1.1268  |
| 17  | C      | 1.1769  | 0.5072  | 2.0613  |
| 18  | N      | 2.3925  | 0.9566  | 1.4573  |
| 19  | C      | 2.2405  | 2.3315  | 0.9513  |
| 20  | C      | 3.2021  | 0.0422  | 0.7539  |
| 21  | C      | 2.7578  | -1.2493 | 0.4132  |
| 22  | C      | 3.6086  | -2.1496 | -0.217  |

|    |   |         |         |         |
|----|---|---------|---------|---------|
| 23 | C | 4.9227  | -1.782  | -0.5455 |
| 24 | C | 5.3672  | -0.4875 | -0.2222 |
| 25 | C | 4.5233  | 0.4037  | 0.4224  |
| 26 | C | 5.7955  | -2.708  | -1.2007 |
| 27 | N | 6.5063  | -3.4612 | -1.7321 |
| 28 | H | -7.4237 | -1.9101 | 0.0447  |
| 29 | H | -6.236  | -3.9867 | 0.7257  |
| 30 | H | -3.7513 | -4.0328 | 0.7653  |
| 31 | H | -2.4626 | -2.0325 | 0.1404  |
| 32 | H | -6.1111 | 0.1175  | -0.5837 |
| 33 | H | -1.9077 | -0.0984 | 0.541   |
| 34 | H | 1.4219  | 4.3903  | -0.6759 |
| 35 | H | -0.7486 | 4.6215  | -1.8564 |
| 36 | H | -2.4969 | 2.8648  | -1.6275 |
| 37 | H | 1.2972  | -0.4811 | 2.503   |
| 38 | H | 0.8871  | 1.2288  | 2.8353  |
| 39 | H | 3.0636  | 2.5539  | 0.2694  |
| 40 | H | 2.3223  | 3.0347  | 1.7925  |
| 41 | H | 1.7302  | -1.5378 | 0.6009  |
| 42 | H | 3.2483  | -3.1393 | -0.479  |
| 43 | H | 6.3841  | -0.1944 | -0.4629 |
| 44 | H | 4.8991  | 1.3823  | 0.7042  |

**Total Energy: -1071.037738 au**

## 2.oHBA-an

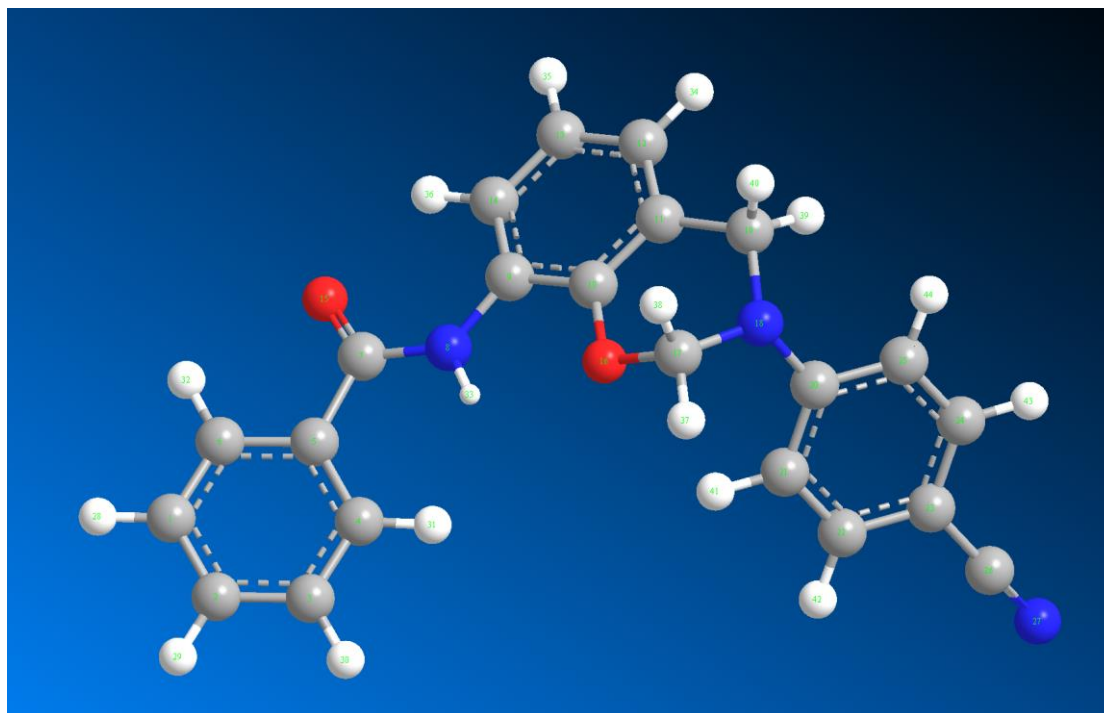

| Tag | Symbol | X       | Y       | Z       |
|-----|--------|---------|---------|---------|
| 1   | C      | -6.1618 | -1.157  | 0.0975  |
| 2   | C      | -5.6818 | -2.452  | 0.3086  |
| 3   | C      | -4.3086 | -2.6988 | 0.2658  |
| 4   | C      | -3.4167 | -1.6533 | 0.0269  |
| 5   | C      | -3.8911 | -0.3484 | -0.1732 |
| 6   | C      | -5.2727 | -0.114  | -0.1491 |
| 7   | C      | -3.0008 | 0.8336  | -0.4484 |
| 8   | N      | -1.7035 | 0.696   | -0.0124 |
| 9   | C      | -0.6351 | 1.5993  | -0.1422 |
| 10  | C      | 0.5892  | 1.1887  | 0.4305  |
| 11  | C      | 1.7312  | 1.9895  | 0.3591  |
| 12  | C      | 1.6399  | 3.2293  | -0.2856 |
| 13  | C      | 0.437   | 3.646   | -0.8469 |
| 14  | C      | -0.7027 | 2.84    | -0.7835 |
| 15  | O      | -3.4286 | 1.8383  | -1.0089 |
| 16  | O      | 0.5855  | -0.0477 | 1.0455  |
| 17  | C      | 1.7409  | -0.275  | 1.8914  |
| 18  | N      | 2.9803  | 0.0596  | 1.2739  |
| 19  | C      | 3.0335  | 1.5002  | 0.9728  |
| 20  | C      | 3.5545  | -0.8495 | 0.3408  |



|    |   |         |         |         |
|----|---|---------|---------|---------|
| 21 | C | 2.8242  | -1.8971 | -0.2414 |
| 22 | C | 3.452   | -2.8017 | -1.1001 |
| 23 | C | 4.8033  | -2.6666 | -1.4143 |
| 24 | C | 5.5306  | -1.6159 | -0.8491 |
| 25 | C | 4.9187  | -0.7238 | 0.0271  |
| 26 | H | -7.2305 | -0.9616 | 0.1225  |
| 27 | H | -6.3753 | -3.2671 | 0.4972  |
| 28 | H | -3.9305 | -3.7073 | 0.4095  |
| 29 | H | -2.3542 | -1.8732 | -0.0402 |
| 30 | H | -5.6256 | 0.8961  | -0.3291 |
| 31 | H | -1.4771 | -0.1186 | 0.5418  |
| 32 | H | 2.5232  | 3.861   | -0.3505 |
| 33 | H | 0.3769  | 4.6077  | -1.3481 |
| 34 | H | -1.6421 | 3.1549  | -1.2149 |
| 35 | H | 1.7047  | -1.3317 | 2.1542  |
| 36 | H | 1.6156  | 0.3418  | 2.7904  |
| 37 | H | 3.864   | 1.6875  | 0.2887  |
| 38 | H | 3.2529  | 2.0499  | 1.9     |
| 39 | H | 1.7599  | -1.9853 | -0.0532 |
| 40 | H | 2.8678  | -3.6052 | -1.5413 |
| 41 | H | 5.2844  | -3.3672 | -2.0906 |
| 42 | H | 6.5873  | -1.5001 | -1.0758 |
| 43 | H | 5.503   | 0.0631  | 0.4961  |

**Total Energy: -1163.282571 au**

### 3.oHBAan-a

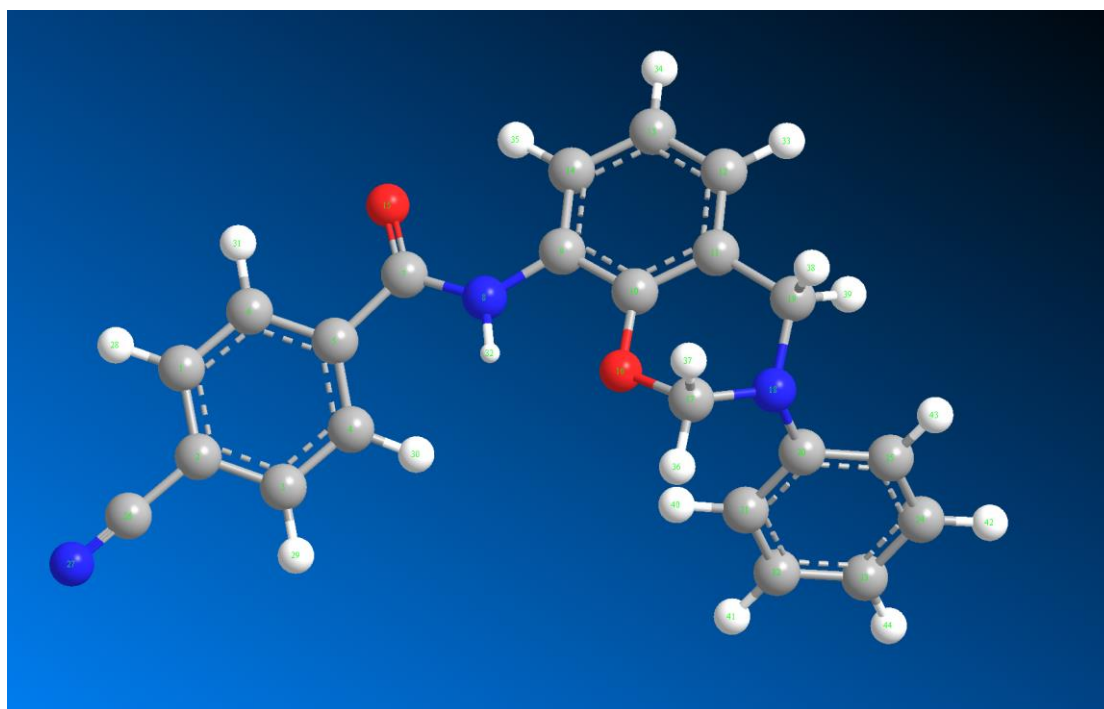

| Tag | Symbol | X       | Y       | Z       |
|-----|--------|---------|---------|---------|
| 1   | C      | -5.7781 | 0.0578  | -0.066  |
| 2   | C      | -5.5205 | -1.315  | 0.0935  |
| 3   | C      | -4.1982 | -1.7862 | 0.0594  |
| 4   | C      | -3.1485 | -0.8906 | -0.1175 |
| 5   | C      | -3.3983 | 0.4821  | -0.2631 |
| 6   | C      | -4.7226 | 0.9414  | -0.2503 |
| 7   | C      | -2.3199 | 1.5141  | -0.4795 |
| 8   | N      | -1.0746 | 1.1525  | -0.0323 |
| 9   | C      | 0.1302  | 1.8744  | -0.1185 |
| 10  | C      | 1.2581  | 1.2508  | 0.4586  |
| 11  | C      | 2.5174  | 1.8545  | 0.4251  |
| 12  | C      | 2.641   | 3.1102  | -0.182  |
| 13  | C      | 1.5336  | 3.7355  | -0.7464 |
| 14  | C      | 0.2764  | 3.1261  | -0.7232 |
| 15  | O      | -2.5776 | 2.5899  | -1.0101 |
| 16  | O      | 1.0398  | 0.0164  | 1.0345  |
| 17  | C      | 2.1315  | -0.4258 | 1.8853  |
| 18  | N      | 3.4164  | -0.2807 | 1.2915  |
| 19  | C      | 3.7114  | 1.1393  | 1.0374  |
| 20  | C      | 3.8531  | -1.2453 | 0.3389  |
| 21  | C      | 2.9738  | -2.1423 | -0.2868 |
| 22  | C      | 3.4635  | -3.1124 | -1.1639 |
| 23  | C      | 4.8248  | -3.1902 | -1.4531 |

|    |   |         |         |         |
|----|---|---------|---------|---------|
| 24 | C | 5.7019  | -2.2892 | -0.844  |
| 25 | C | 5.2255  | -1.3349 | 0.0507  |
| 26 | C | -6.6043 | -2.2352 | 0.2818  |
| 27 | N | -7.4824 | -2.9824 | 0.4363  |
| 28 | H | -6.8018 | 0.4172  | -0.0468 |
| 29 | H | -4.0036 | -2.8487 | 0.1626  |
| 30 | H | -2.1363 | -1.2803 | -0.1778 |
| 31 | H | -4.9009 | 2.0018  | -0.3922 |
| 32 | H | -0.9899 | 0.2948  | 0.4967  |
| 33 | H | 3.6167  | 3.5897  | -0.2159 |
| 34 | H | 1.6412  | 4.7077  | -1.2184 |
| 35 | H | -0.59   | 3.6032  | -1.1586 |
| 36 | H | 1.9164  | -1.4694 | 2.1119  |
| 37 | H | 2.093   | 0.1762  | 2.8017  |
| 38 | H | 4.0034  | 1.6187  | 1.9832  |
| 39 | H | 4.5715  | 1.2069  | 0.3679  |
| 40 | H | 1.9056  | -2.0628 | -0.1169 |
| 41 | H | 2.7658  | -3.7974 | -1.6388 |
| 42 | H | 6.7676  | -2.341  | -1.0506 |
| 43 | H | 5.9203  | -0.6685 | 0.5541  |
| 44 | H | 5.1988  | -3.9404 | -2.1438 |

**Total Energy: -1163.279761 au**

#### 4.oHBAan-an

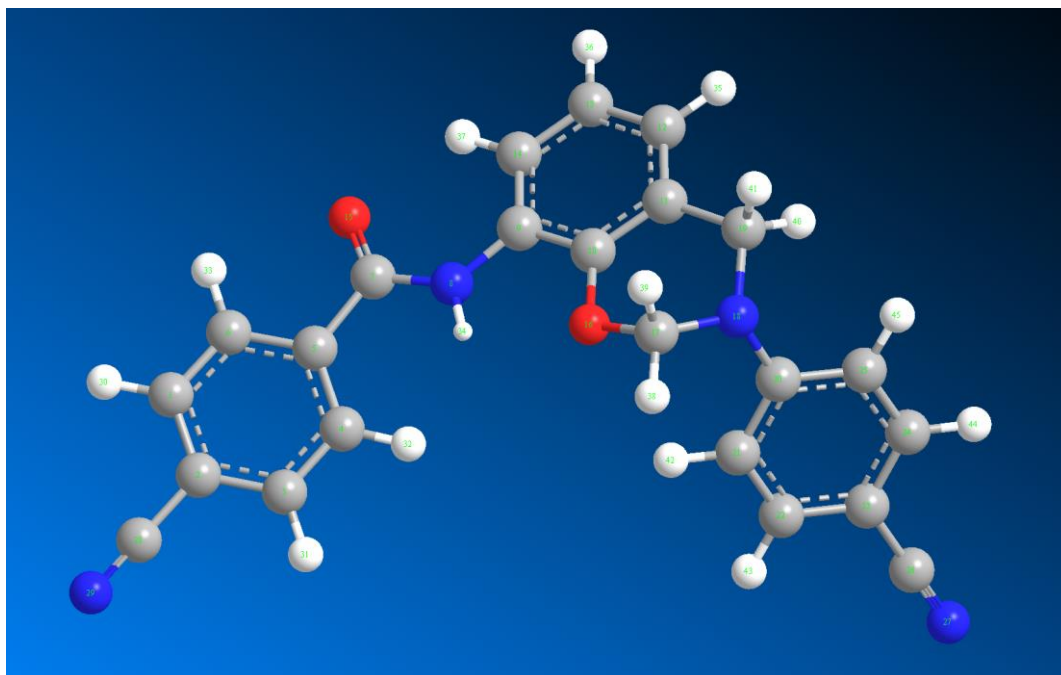

| Tag | Symbol | X       | Y       | Z       |
|-----|--------|---------|---------|---------|
| 1   | C      | -6.1178 | -0.5783 | -0.2092 |
| 2   | C      | -5.6764 | -1.8624 | 0.1548  |
| 3   | C      | -4.3006 | -2.1322 | 0.2328  |
| 4   | C      | -3.3811 | -1.1231 | -0.0344 |
| 5   | C      | -3.8155 | 0.1644  | -0.383  |
| 6   | C      | -5.1905 | 0.4189  | -0.4822 |
| 7   | C      | -2.8862 | 1.3081  | -0.7007 |
| 8   | N      | -1.6272 | 1.199   | -0.1626 |
| 9   | C      | -0.5433 | 2.0854  | -0.2914 |
| 10  | C      | 0.6311  | 1.724   | 0.4036  |
| 11  | C      | 1.7813  | 2.5142  | 0.35    |
| 12  | C      | 1.7474  | 3.6948  | -0.4023 |
| 13  | C      | 0.5931  | 4.0622  | -1.0865 |
| 14  | C      | -0.5538 | 3.2656  | -1.0408 |
| 15  | O      | -3.2635 | 2.2562  | -1.3808 |
| 16  | O      | 0.5734  | 0.5444  | 1.1233  |
| 17  | C      | 1.6455  | 0.4139  | 2.0813  |
| 18  | N      | 2.9341  | 0.6741  | 1.5226  |
| 19  | C      | 3.0364  | 2.0787  | 1.0912  |
| 20  | C      | 3.5927  | -0.33   | 0.7828  |
| 21  | C      | 2.9418  | -1.5042 | 0.3608  |
| 22  | C      | 3.6419  | -2.5033 | -0.3055 |
| 23  | C      | 5.0078  | -2.3515 | -0.5893 |

|    |   |         |         |         |
|----|---|---------|---------|---------|
| 24 | C | 5.6602  | -1.1739 | -0.1828 |
| 25 | C | 4.9651  | -0.1861 | 0.4978  |
| 26 | C | 5.7256  | -3.3777 | -1.2826 |
| 27 | N | 6.3104  | -4.2119 | -1.8454 |
| 28 | C | -6.6267 | -2.8983 | 0.4387  |
| 29 | N | -7.3963 | -3.7387 | 0.6721  |
| 30 | H | -7.1817 | -0.3758 | -0.2765 |
| 31 | H | -3.9628 | -3.1299 | 0.4932  |
| 32 | H | -2.3221 | -1.3636 | -0.0038 |
| 33 | H | -5.5103 | 1.4117  | -0.7793 |
| 34 | H | -1.4503 | 0.437   | 0.478   |
| 35 | H | 2.6369  | 4.3183  | -0.455  |
| 36 | H | 0.5779  | 4.9772  | -1.6711 |
| 37 | H | -1.455  | 3.5444  | -1.5678 |
| 38 | H | 1.5786  | -0.6021 | 2.4678  |
| 39 | H | 1.4642  | 1.1337  | 2.889   |
| 40 | H | 3.9077  | 2.1914  | 0.4433  |
| 41 | H | 3.2075  | 2.7135  | 1.9722  |
| 42 | H | 1.8755  | -1.621  | 0.5148  |
| 43 | H | 3.1242  | -3.4003 | -0.6303 |
| 44 | H | 6.7187  | -1.0496 | -0.3875 |
| 45 | H | 5.496   | 0.695   | 0.8442  |

**Total Energy: -1255.523967 au**
